# Supplementary material
Source: publisher figshare collection journal article supplement (https://acs.figshare.com/ndownloader/files/9500896)

## Supporting information

### Selenoglutathione Diselenide. Unique Redox Reactions in the GPx-Like Catalytic Cycle and Repairing of Disulfide Bonds in Scrambled Protein

Shingo Shimodaira, Yuki Asano, Kenta Arai, and Michio Iwaoka\*

Department of Chemistry, School of Science, Tokai University, Kitakaname, Hiratsuka-shi, Kanagawa 259-1292, Japan

Supplementary Material

Figure S1. The reaction of  $\text{GSe}^-$  with GSSG or  $\text{H}_2\text{O}_2$ .

Figure S2. The reaction of  $\text{GSeSeG}$  with  $\text{H}_2\text{O}_2$ .

Figure S3. MALDI-TOF mass spectrum of a 1:1 mixture of  $\text{GSeSeG}$  and  $\text{H}_2\text{O}_2$  in the presence of dimedone (6 eq) in  $\text{H}_2\text{O}$ .

Figure S4. The reaction of  $\text{GSeO}_2\text{H}$  with 1 or 2 eq GSH.

Figure S5. MALDI-TOF mass spectrum of a 1:3 mixture of  $\text{GSeO}_2\text{H}$  and GSH in  $\text{H}_2\text{O}$ .

Figure S6. The reaction of  $\text{GSeO}_2\text{H}$  with various thiols.

Figure S7. Disproportionation of  $\text{GSeSCH}_2\text{CH}_2\text{NH}_2$  and  $\text{GSeSCH}_2\text{Ph}$ .

Figure S8. Reduction of  $\text{GSeSG}$  with  $\text{DTT}^{\text{red}}$  in the absence or presence of IAM.

Figure S9. The reaction of  $\text{GSeSG}$  with  $\text{HSCH}_2\text{CH}_2\text{NH}_2$ .

Figure S10. The reaction of  $\text{GSeSG}$  with  $\text{HSCH}_2\text{CH}_2\text{CO}_2\text{H}$ .

Figure S11. The reaction of  $\text{GSeSG}$  with  $\text{HSCH}_2\text{CH}_2\text{OH}$ .

Figure S12. The reaction of  $\text{GSeSG}$  with  $\text{HSCH}_2\text{Ph}$ .

Figure S13. Oxidative folding pathways of RNase A.

Figure S14. HPLC chromatograms obtained from the refolding experiment of 4S of RNase A using  $\text{GSeSeG}$  or GSSG.

NMR and MALDI-TOF mass spectrums for **1**, **4**, and **6-9**.

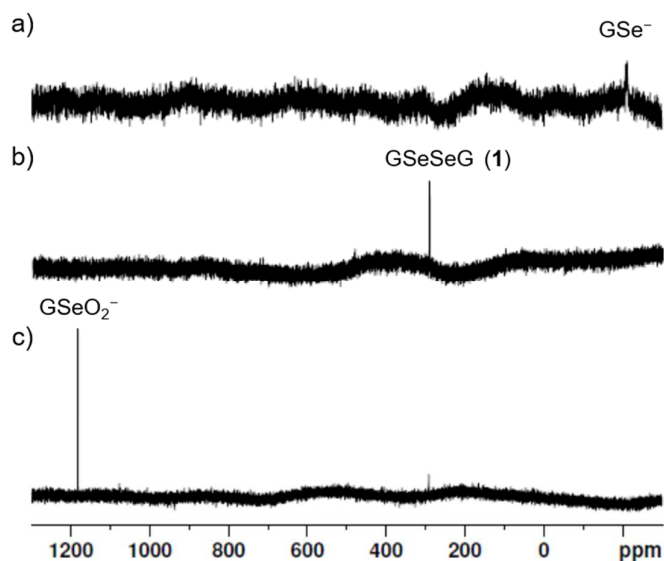

Figure S1. The reaction of  $\text{GSe}^-$  with GSSG or  $\text{H}_2\text{O}_2$  in  $\text{D}_2\text{O}$  monitored by  $^{77}\text{Se}$  NMR. a) A 1:3 mixture of  $\text{GSeSeG}$  and  $\text{DTT}^{\text{red}}$  in  $\text{D}_2\text{O}$  containing  $\text{NaOH}$  (pH 10). b) After addition of GSSG (3 eq) to a). c) After addition of  $\text{H}_2\text{O}_2$  (6 eq) to a).

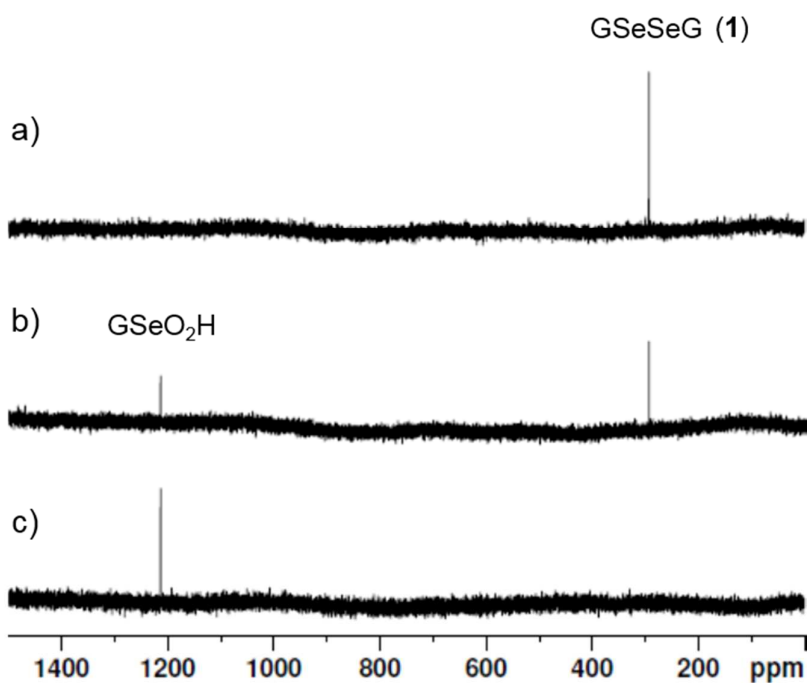

Figure S2. The reaction of  $\text{GSeSeG}$  with  $\text{H}_2\text{O}_2$  in  $\text{D}_2\text{O}$  monitored by  $^{77}\text{Se}$  NMR. a)  $\text{GSeSeG (1)}$ . b) A 1:1 mixture of **1** and  $\text{H}_2\text{O}_2$ . c) A 1:3 mixture of **1** and  $\text{H}_2\text{O}_2$ .

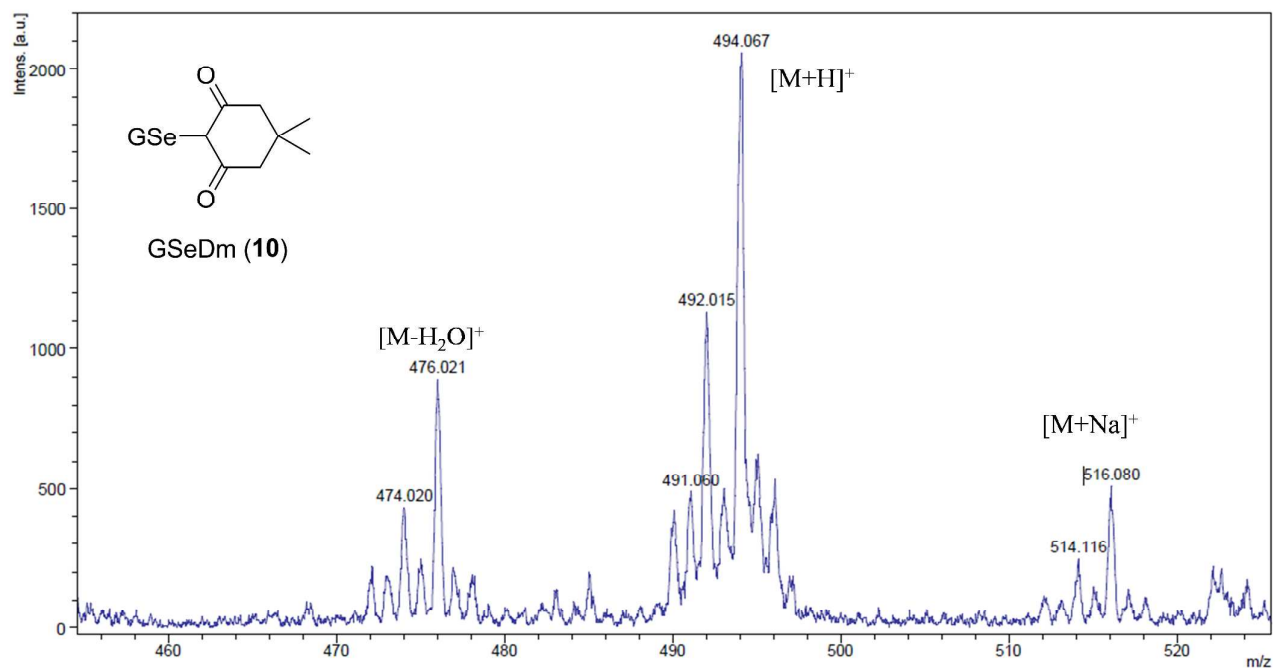

Figure S3. MALDI-TOF mass spectrum of a 1:1 mixture of GSeSeG and H<sub>2</sub>O<sub>2</sub> in the presence of dimedone (6 eq) in H<sub>2</sub>O.

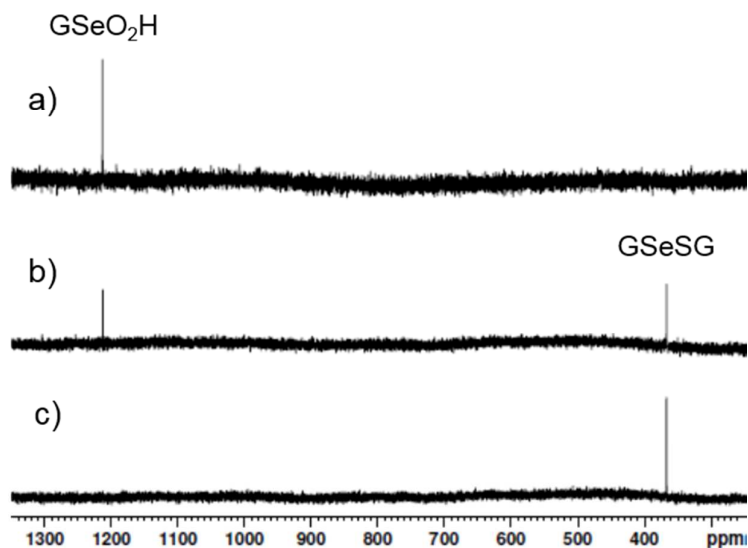

Figure S4. The reaction of GSeO<sub>2</sub>H with 1 or 2 eq GSH in D<sub>2</sub>O monitored by <sup>77</sup>Se NMR. a) A 1:3 mixture of GSeSeG and H<sub>2</sub>O<sub>2</sub>. b) After addition of GSH (1 eq) to a). c) After addition of GSH (2 eq) to a).

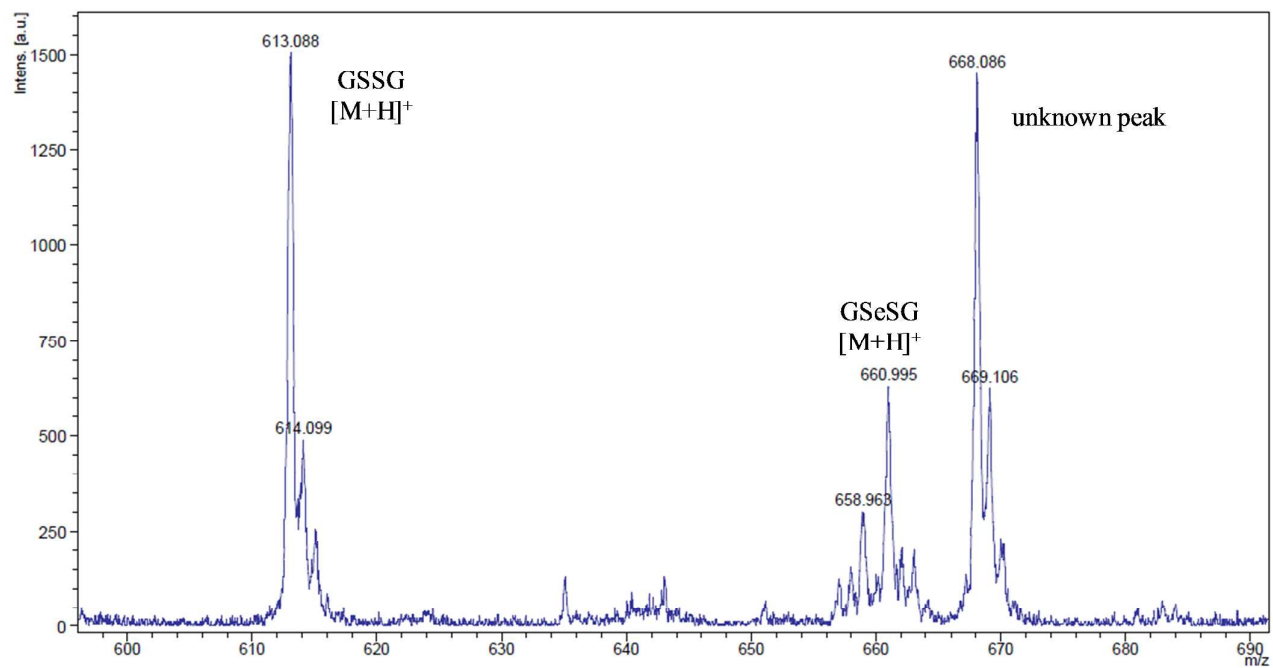

Figure S5. MALDI-TOF mass spectrum of a 1:3 mixture of GSeO<sub>2</sub>H and GSH in H<sub>2</sub>O.

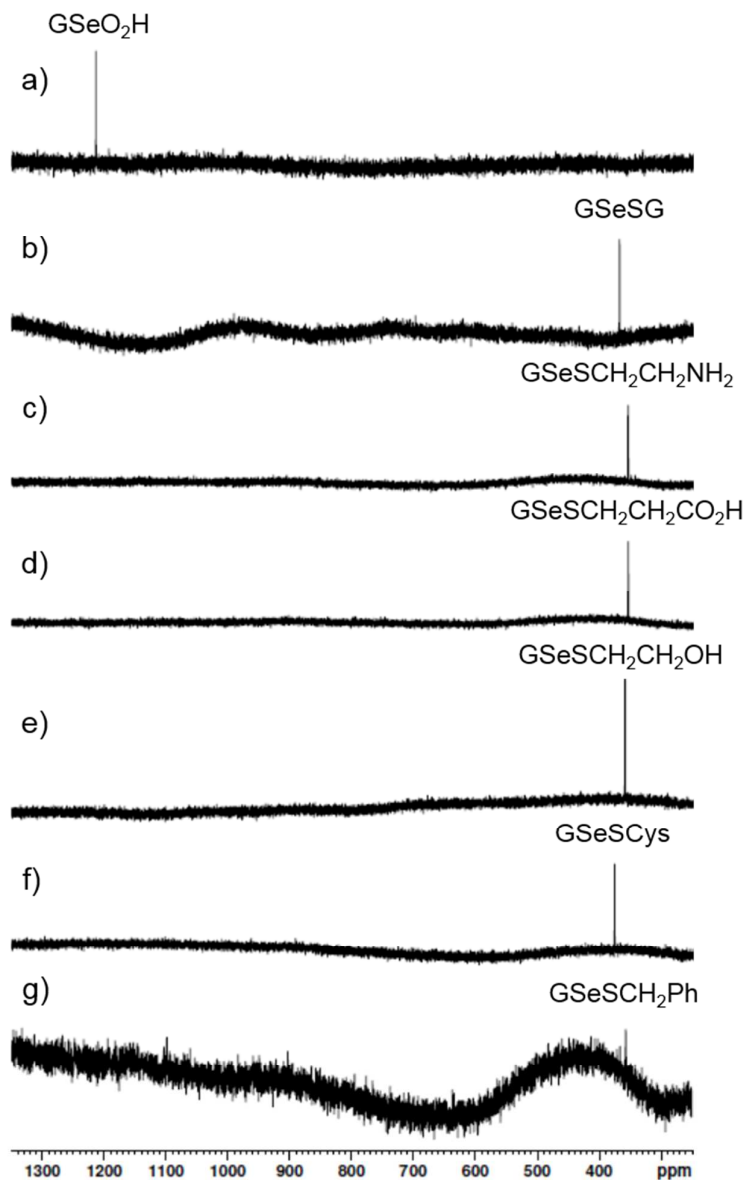

Figure S6. The reaction of  $\text{GSeO}_2\text{H}$  with various thiols in  $\text{D}_2\text{O}$  monitored by  $^{77}\text{Se}$  NMR. a) A 1:3 mixture of  $\text{GSeSeG}$  and  $\text{H}_2\text{O}_2$  in  $\text{D}_2\text{O}$ . b) After addition of  $\text{GSH}$  (3 eq) to a). c) After addition of  $\text{HSCH}_2\text{CH}_2\text{NH}_2$  (3 eq) to a). d) After addition of  $\text{HSCH}_2\text{CH}_2\text{CO}_2\text{H}$  (3 eq) to a). e) After addition of  $\text{HSCH}_2\text{CH}_2\text{OH}$  (3 eq) to a). f) After addition of  $\text{CysSH}$  (3 eq) to a). g) After addition of  $\text{HSCH}_2\text{Ph}$  (3 eq) to a). Dibenzyl disulfide was precipitated.

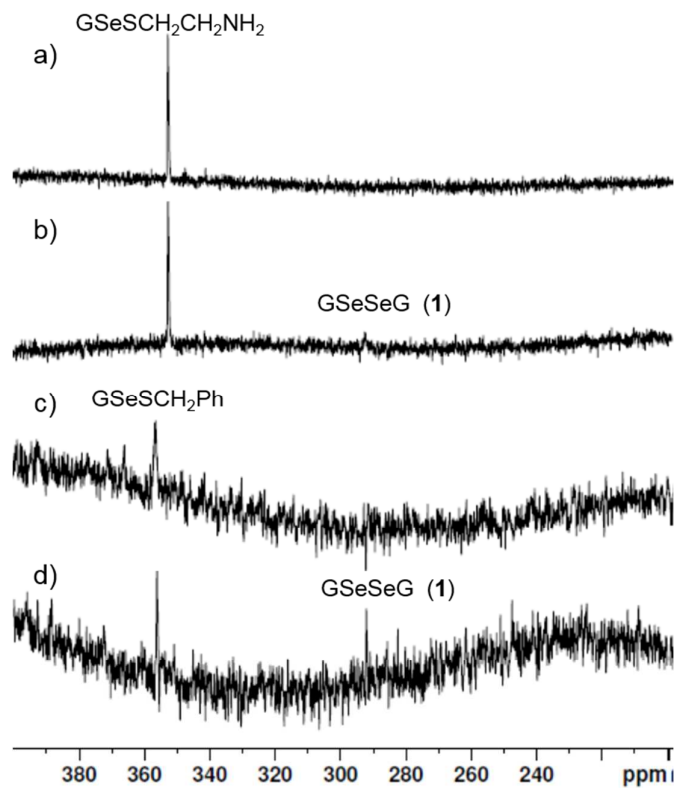

Figure S7. Disproportionation of  $\text{GSeSCH}_2\text{CH}_2\text{NH}_2$  and  $\text{GSeSCH}_2\text{Ph}$  in  $\text{D}_2\text{O}$  monitored by  $^{77}\text{Se}$  NMR. a) A mixture of  $\text{GSeO}_2\text{H}$  and  $\text{HSCH}_2\text{CH}_2\text{NH}_2$  (1:3) after 10 min. b) A mixture of  $\text{GSeO}_2\text{H}$  and  $\text{HSCH}_2\text{CH}_2\text{NH}_2$  (1:3) after 24 h. c) A mixture of  $\text{GSeO}_2\text{H}$  and  $\text{PhCH}_2\text{SH}$  (1:3) after 10 min. d) A mixture of  $\text{GSeO}_2\text{H}$  and  $\text{PhCH}_2\text{SH}$  (1:3) after 24 h.

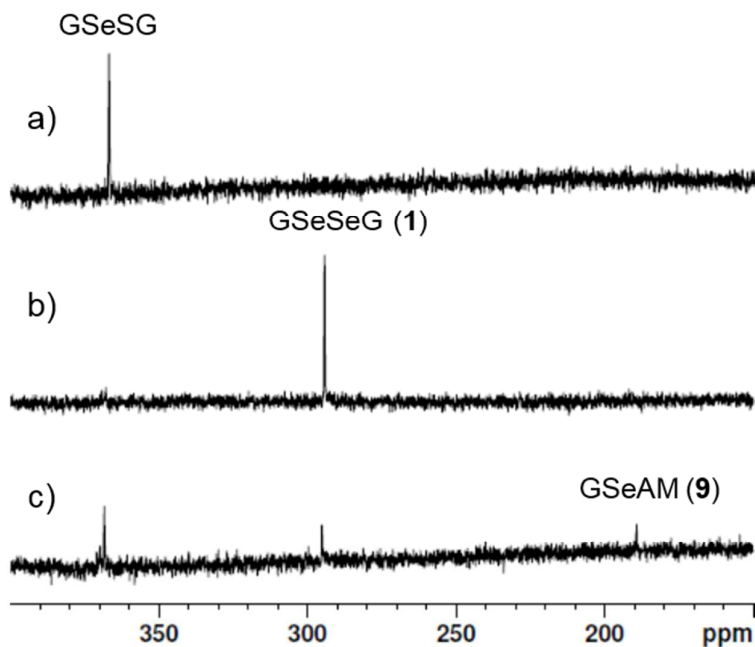

Figure S8. Reduction of  $\text{GSeSG}$  with  $\text{DTT}^{\text{red}}$  in the absence or presence of IAM in  $\text{D}_2\text{O}$  monitored by  $^{77}\text{Se}$  NMR. a) A mixture of  $\text{GSeO}_2\text{H}$  and  $\text{GSH}$  (1:3) after 10 min. b) After addition of  $\text{DTT}^{\text{red}}$  (2 eq) to a). c) After addition of  $\text{DTT}^{\text{red}}$  (2 eq) to a) in the presence IAM (5 eq).

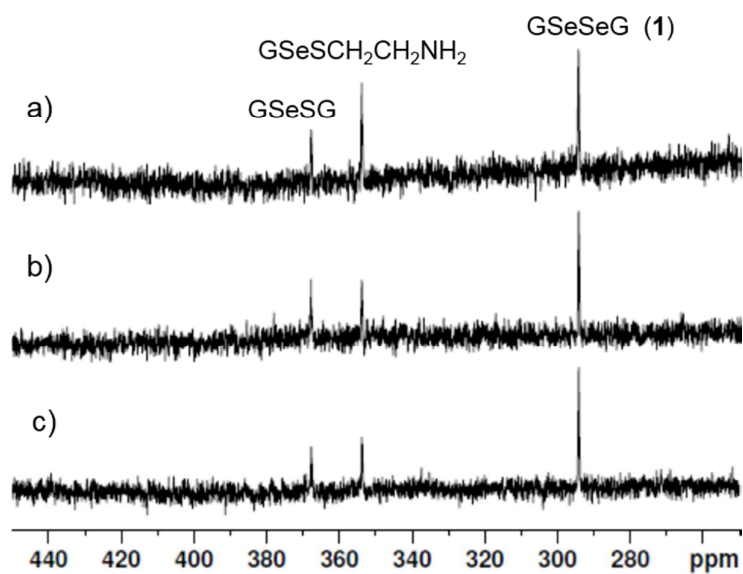

Figure S9. The reaction of GSeSG with  $\text{HSCH}_2\text{CH}_2\text{NH}_2$  in  $\text{D}_2\text{O}$  monitored by  $^{77}\text{Se}$  NMR. a) A mixture of GSeSG and  $\text{HSCH}_2\text{CH}_2\text{NH}_2$  (1:3) after 10 min. b) After 6 h. c) After 24 h.

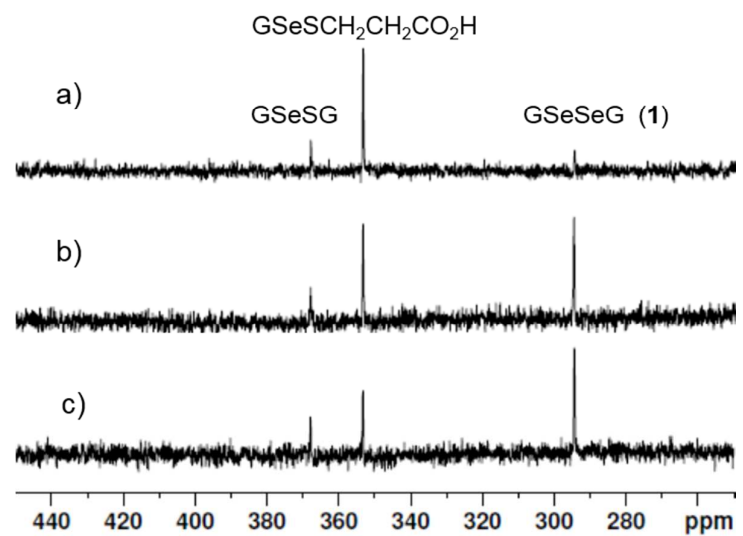

Figure S10. The reaction of GSeSG with  $\text{HSCH}_2\text{CH}_2\text{CO}_2\text{H}$  in  $\text{D}_2\text{O}$  monitored by  $^{77}\text{Se}$  NMR. a) A mixture of GSeSG and  $\text{HSCH}_2\text{CH}_2\text{CO}_2\text{H}$  (1:3) after 10 min. b) After 6 h. c) After 24 h.

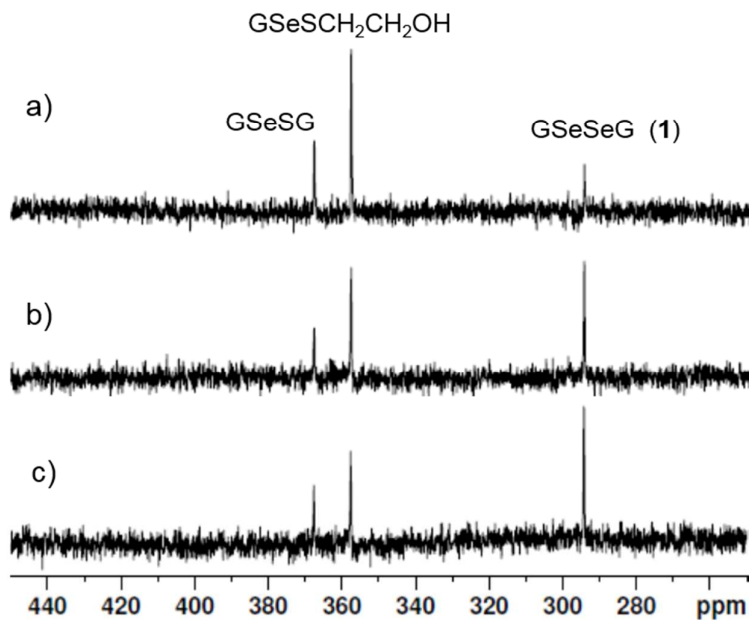

Figure S11. The reaction of GSeSG with HSCH<sub>2</sub>CH<sub>2</sub>OH in D<sub>2</sub>O monitored by <sup>77</sup>Se NMR. a) A mixture of GSeSG and HSCH<sub>2</sub>CH<sub>2</sub>OH (1:3) after 10 min. b) After 6 h. c) After 24 h.

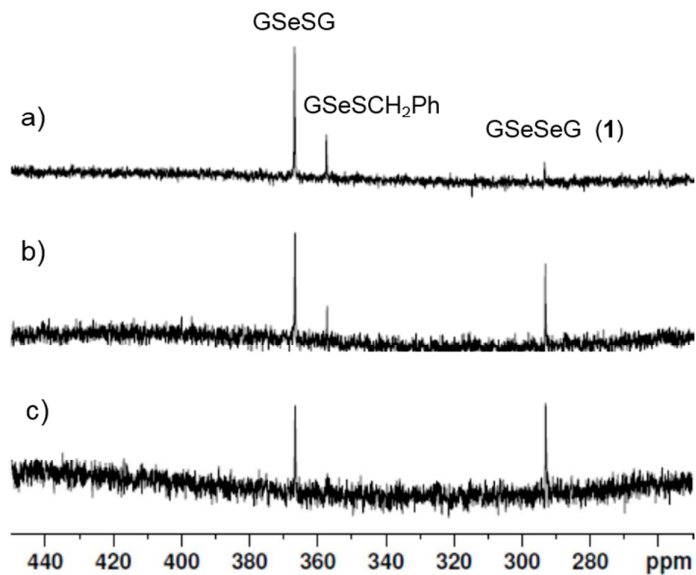

Figure S12. The reaction of GSeSG with HSCH<sub>2</sub>Ph in D<sub>2</sub>O monitored by <sup>77</sup>Se NMR. a) A mixture of GSeSG and HSCH<sub>2</sub>Ph (1:3) after 10 min. b) After 6 h. c) After 24 h.

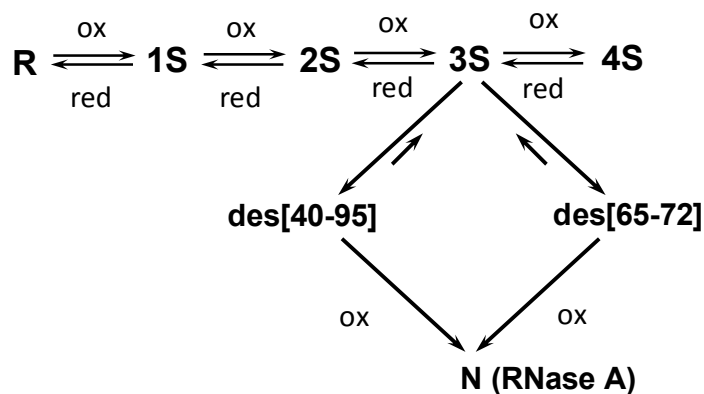

Figure S13. Oxidative folding pathways of RNase A. R, 1S, 2S, 3S, 4S, des[40-95], des[65-72], and N represent reduced RNase A, ensembles of one-disulfide, two-disulfide, three-disulfide, and four-disulfide intermediates, a three-disulfide intermediate having three native disulfide bonds but lacking one native disulfide bond of Cys40—Cys95, a three-disulfide intermediate having three native disulfide bonds but lacking one native disulfide bond of Cys65—Cys72, and native RNase A, respectively. (Rothwarf, D. M., Li, Y.-J., Scheraga, H. A. *Biochemistry* **1998**, 37, 3760–3766; Rothwarf, D. M., Li, Y.-J., Scheraga, H. A. *Biochemistry* **1998**, 37, 3767–3776.)

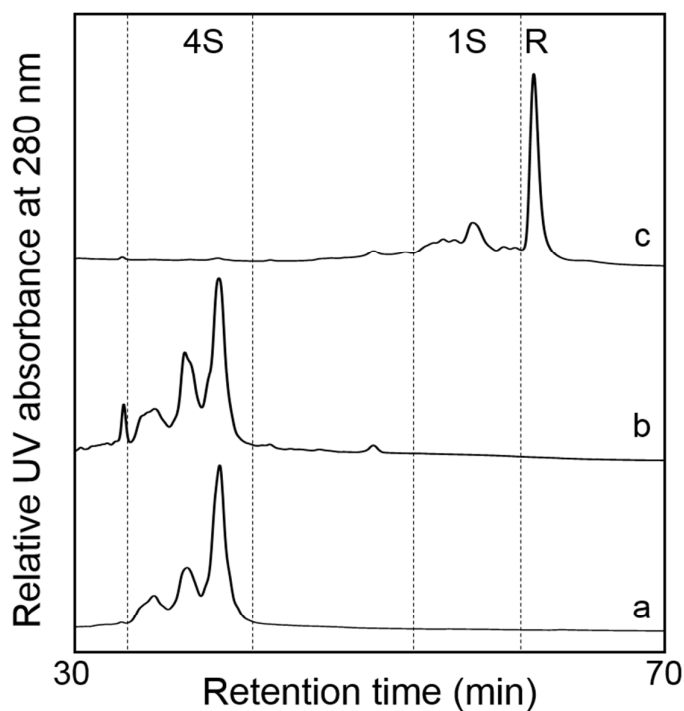

Figure S14. HPLC chromatograms obtained from the refolding experiment of 4S of RNase A using GSeSeG (1) or GSSG in presence of NADPH and GR at pH 7.5 and 25°C. The reaction conditions were  $[4S]_0 = 15 \mu\text{M}$ ,  $[\text{NADPH}]_0 = 0.3 \text{ mM}$ , and  $[\text{GR}] = 4 \text{ U/mL}$ . a) Before addition of the catalyst, b) 3 h after addition of GSSG (15  $\mu\text{M}$ ), and c) 15 min after addition of GSeSeG (15  $\mu\text{M}$ ).

***N*-(9-fluorenylmethoxycarbonyl)-*Se*-(*p*-methoxybenzyl)-*L*-selenocysteinyglycine-*tert*-butyl ester (4)**<sup>1</sup>H in CDCl<sub>3</sub>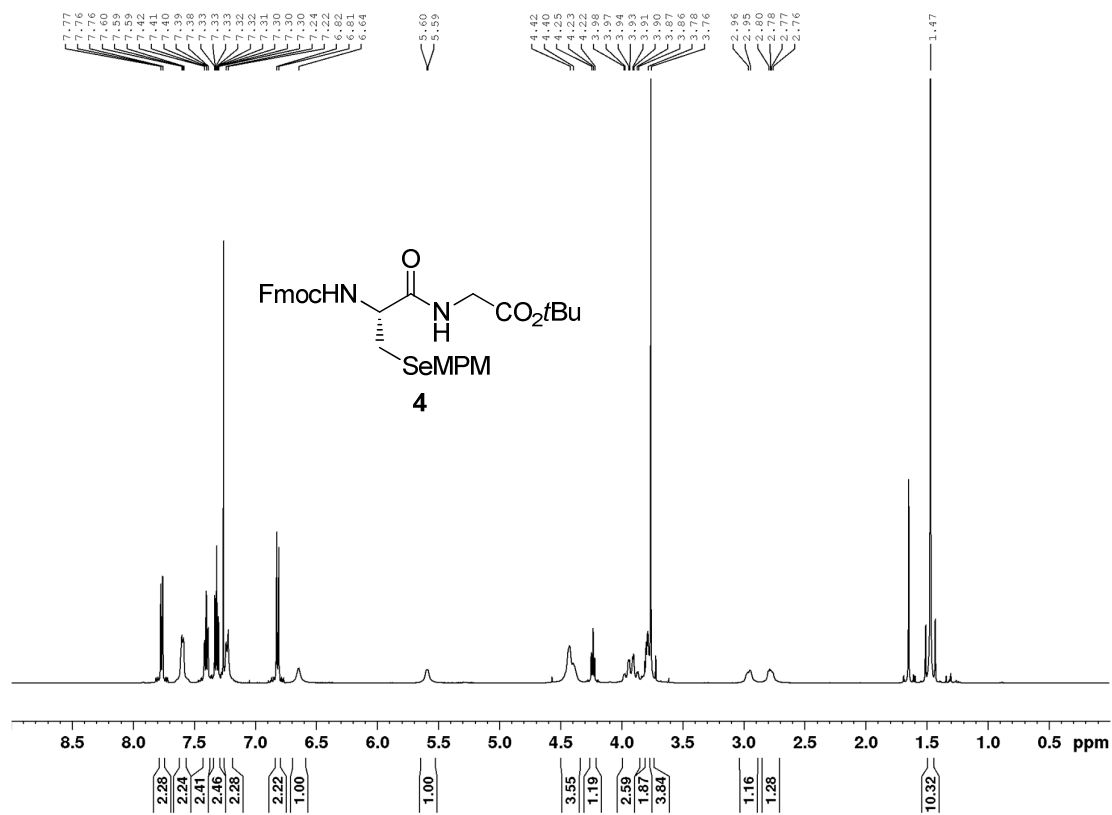<sup>13</sup>C in CDCl<sub>3</sub>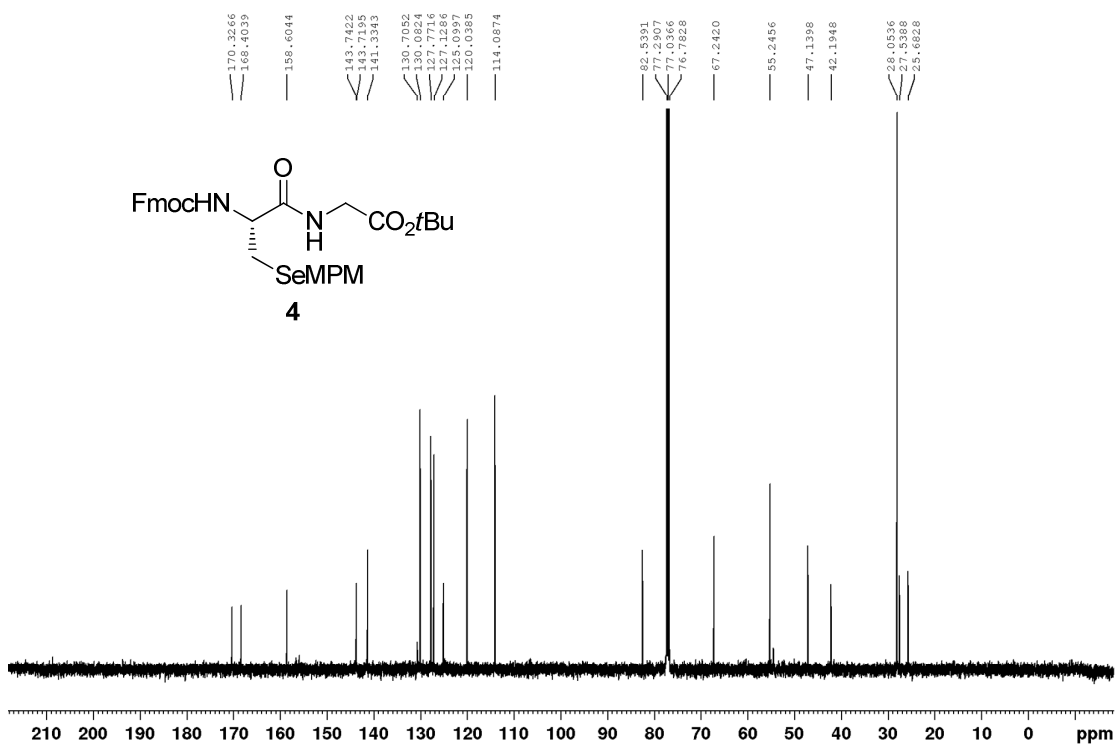

$^{77}\text{Se}$  in  $\text{CDCl}_3$

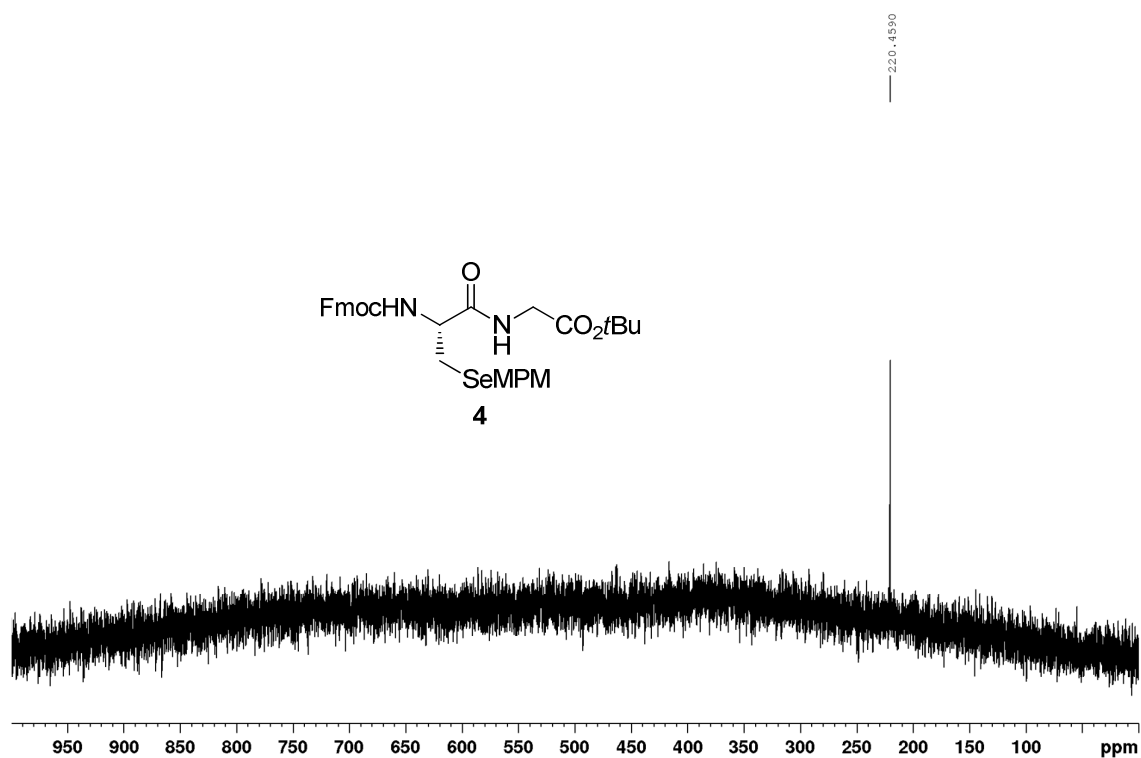

MALDI-TOF-MS

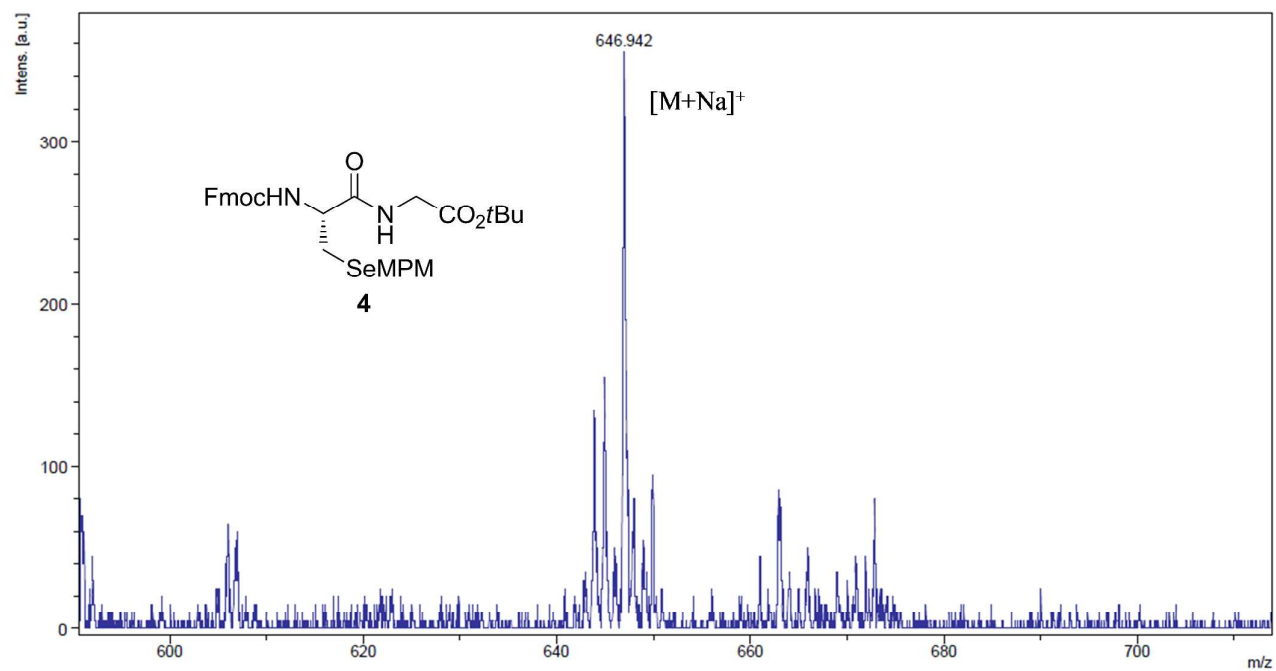

***N*-(*tert*-butoxycarbonyl)-*O*<sup>1</sup>-*tert*-butyl-L-glutamyl-*Se*-(*p*-methoxybenzyl)-L-selenocysteinyglycine-*tert*-butyl ester (6)**

<sup>1</sup>H in CDCl<sub>3</sub>

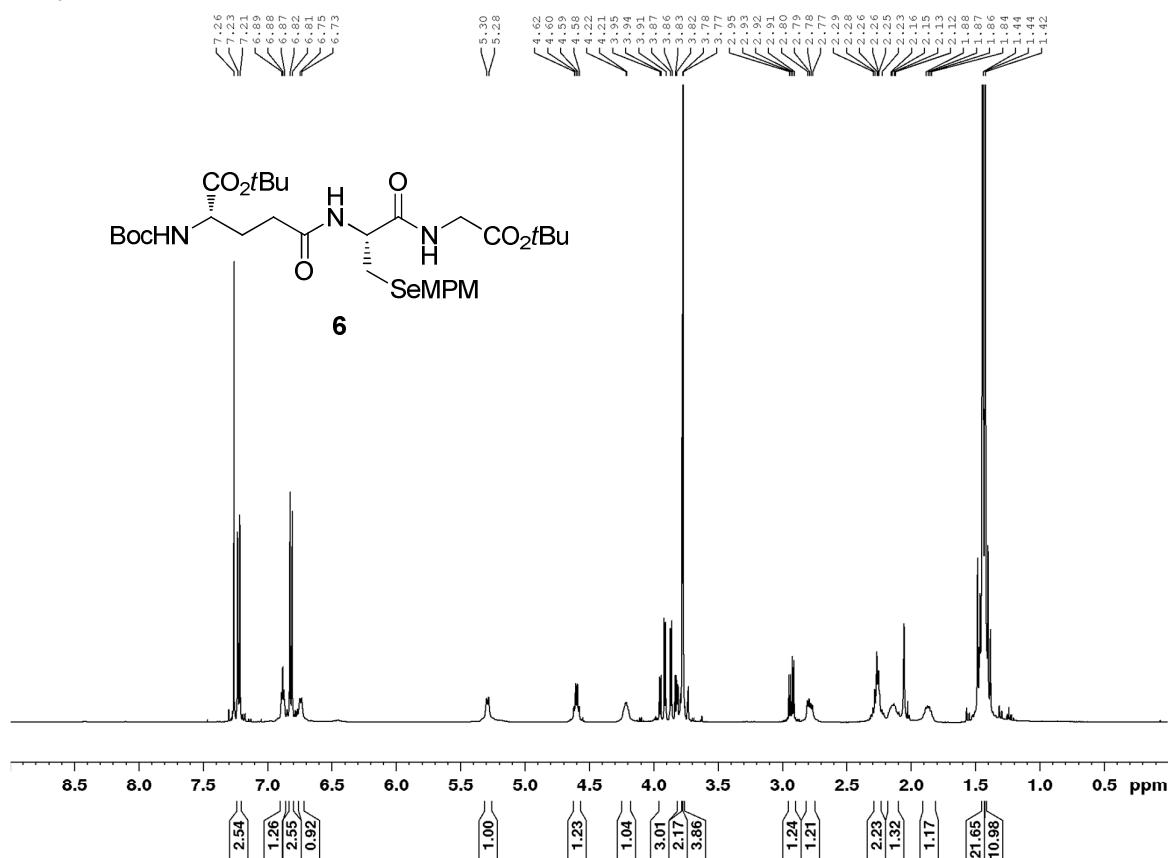

<sup>13</sup>C in CDCl<sub>3</sub>

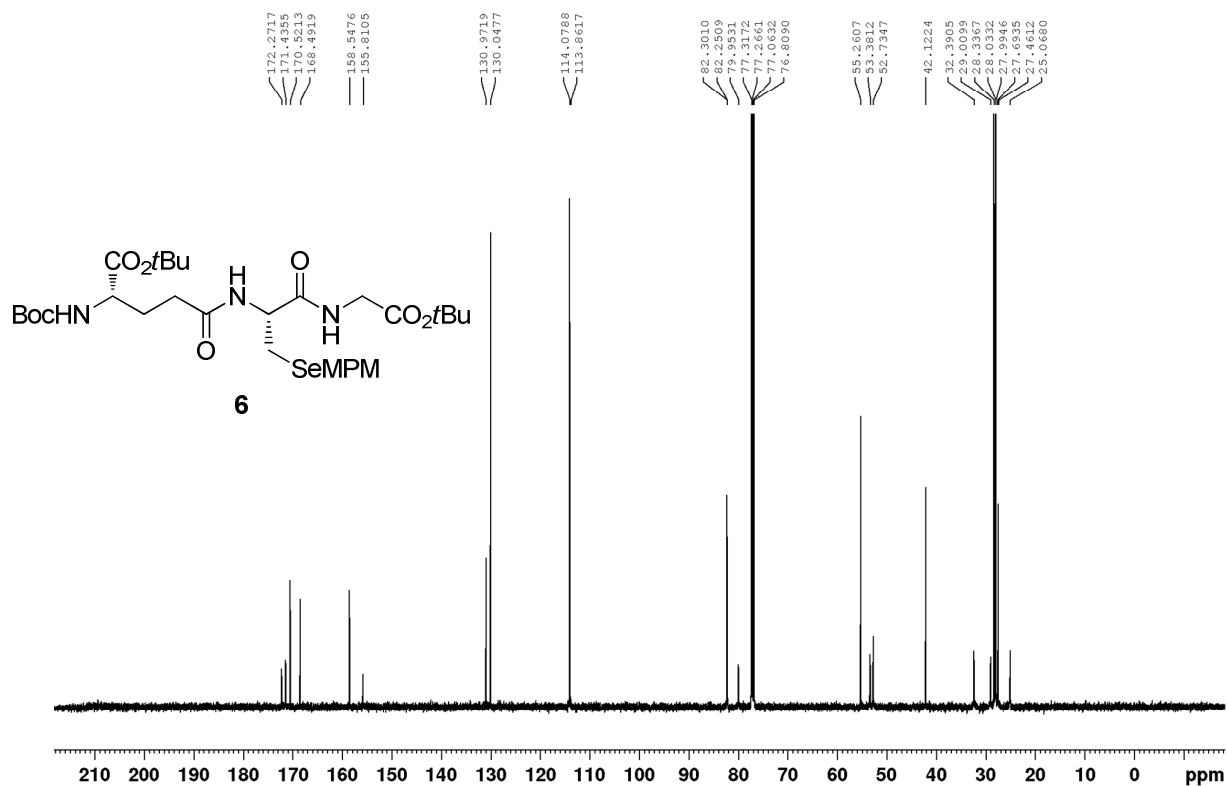

$^{77}\text{Se}$  in  $\text{CDCl}_3$

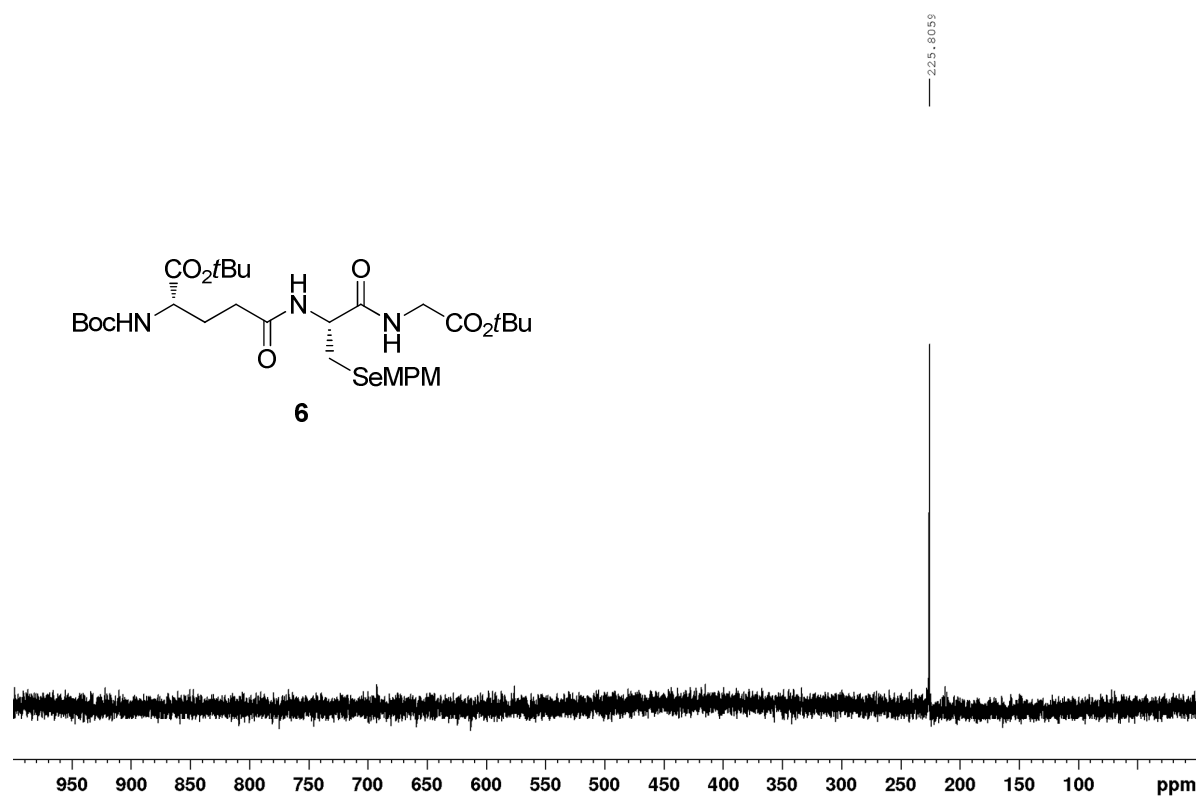

MALDI-TOF-MS

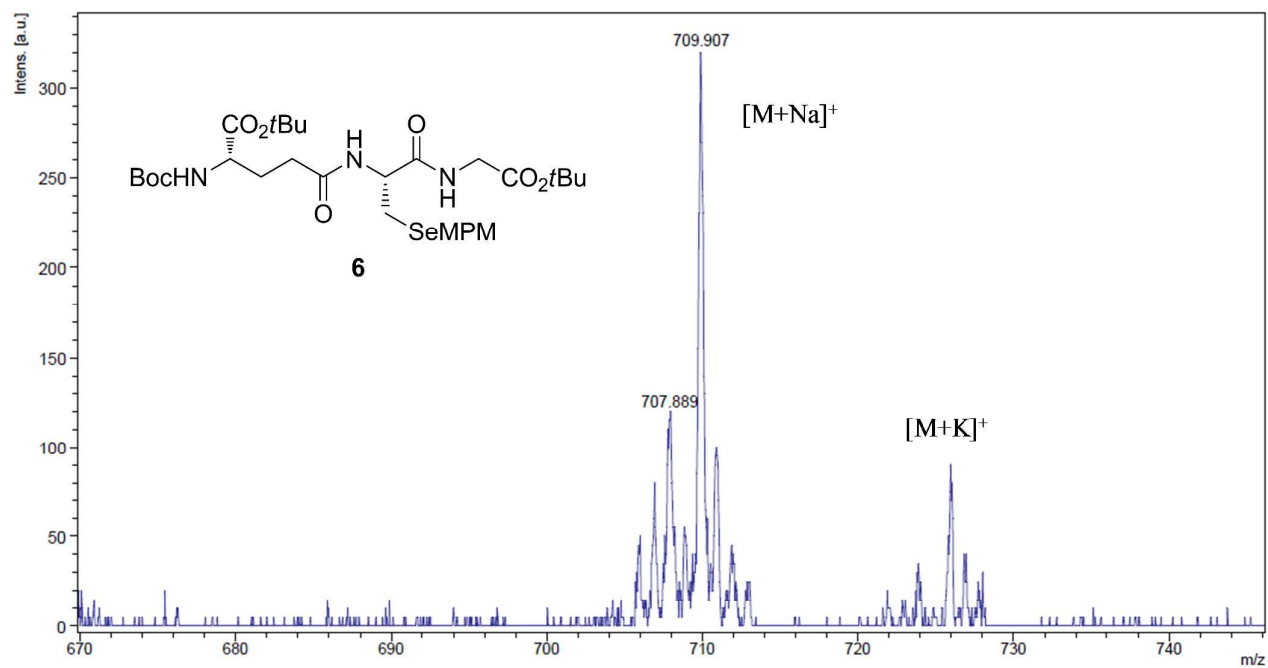

***N*-(*tert*-butoxycarbonyl)-*O*<sup>1</sup>-*tert*-butyl-L-glutamyl-L-selenocysteinyglycine-*tert*-butyl ester diselenide (7)**

<sup>1</sup>H in CDCl<sub>3</sub>

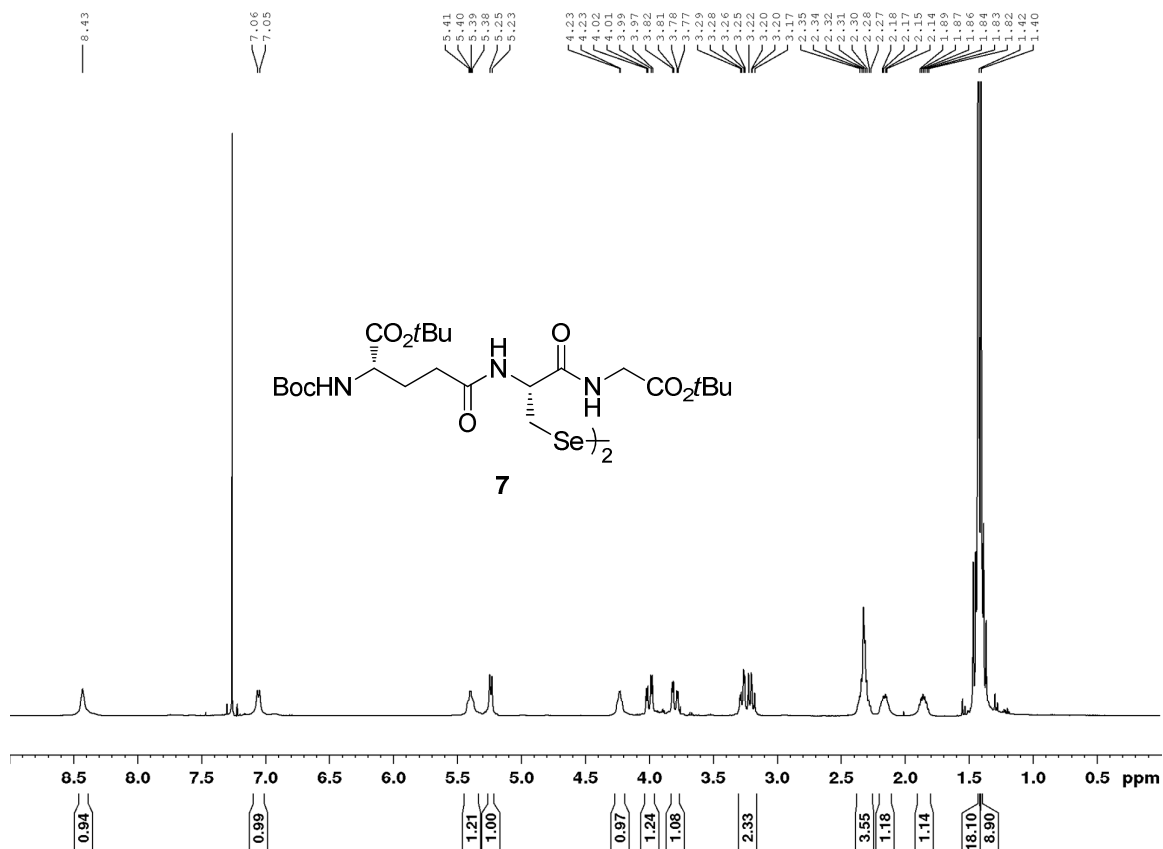

<sup>13</sup>C in CDCl<sub>3</sub>

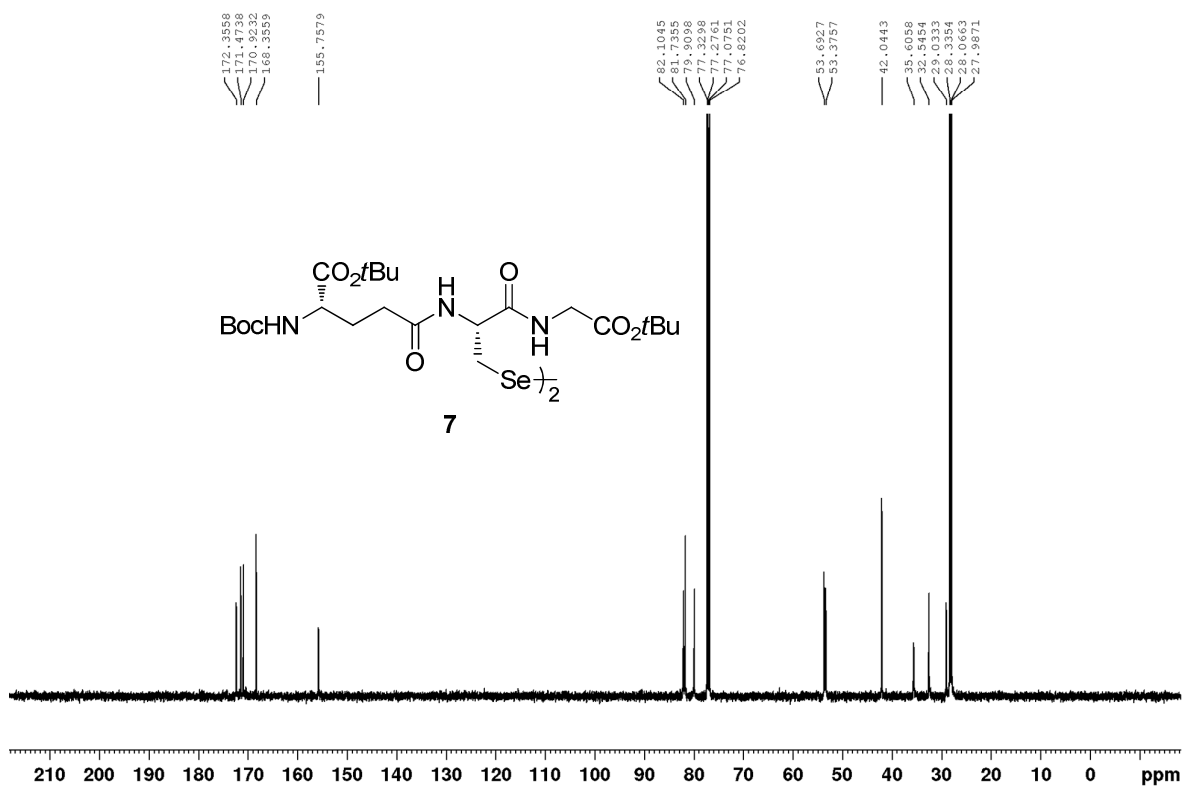

$^{77}\text{Se}$  in  $\text{CDCl}_3$

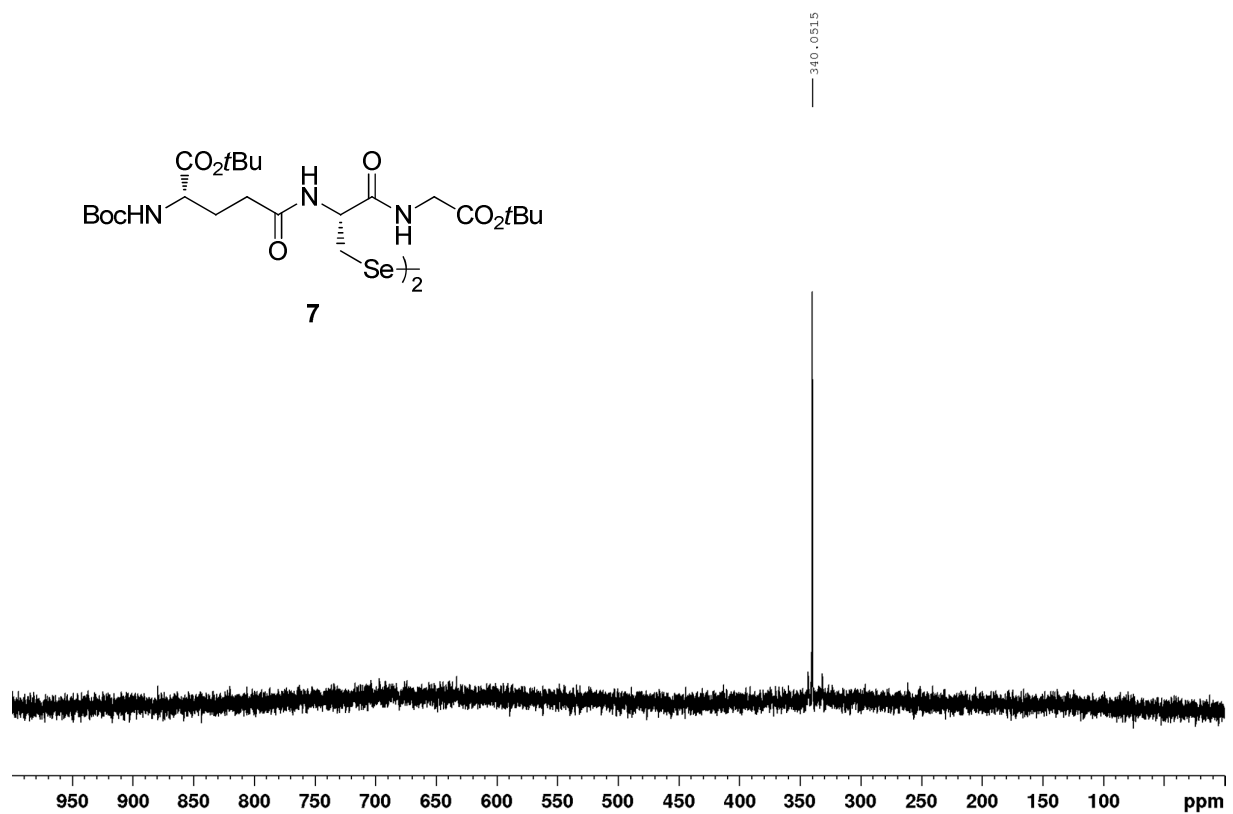

MALDI-TOF-MS

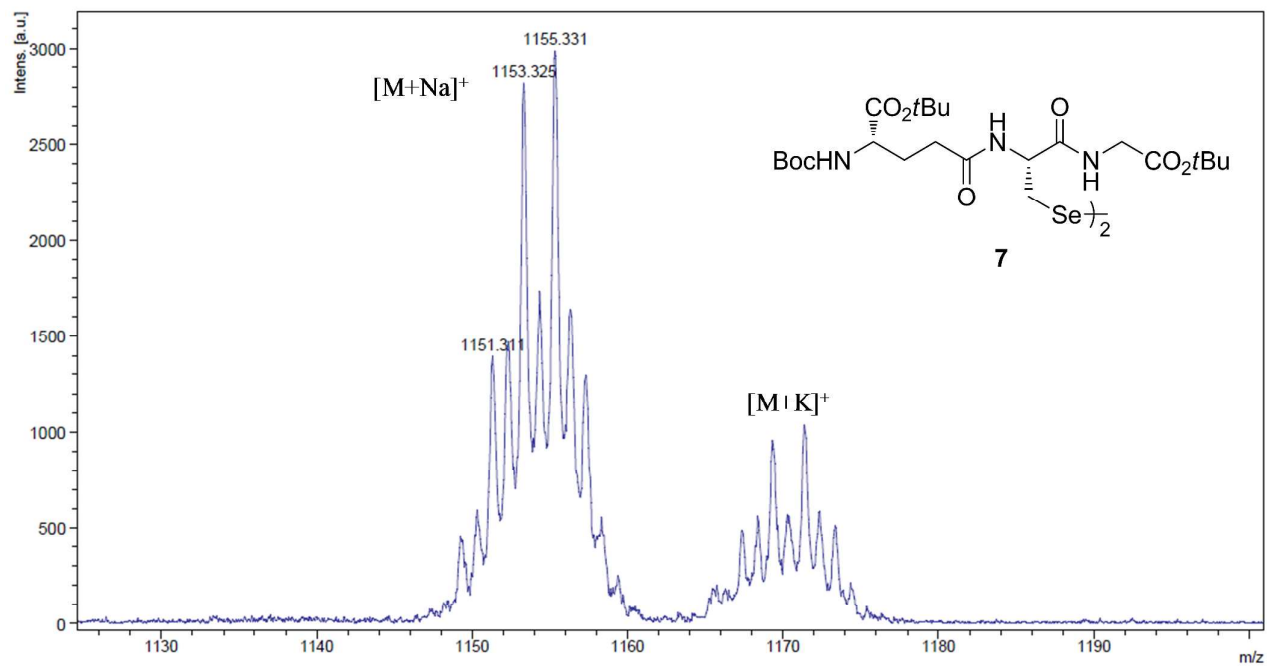

**selenoglutathione diselenide (1)**

$^1\text{H}$  in  $\text{D}_2\text{O}$

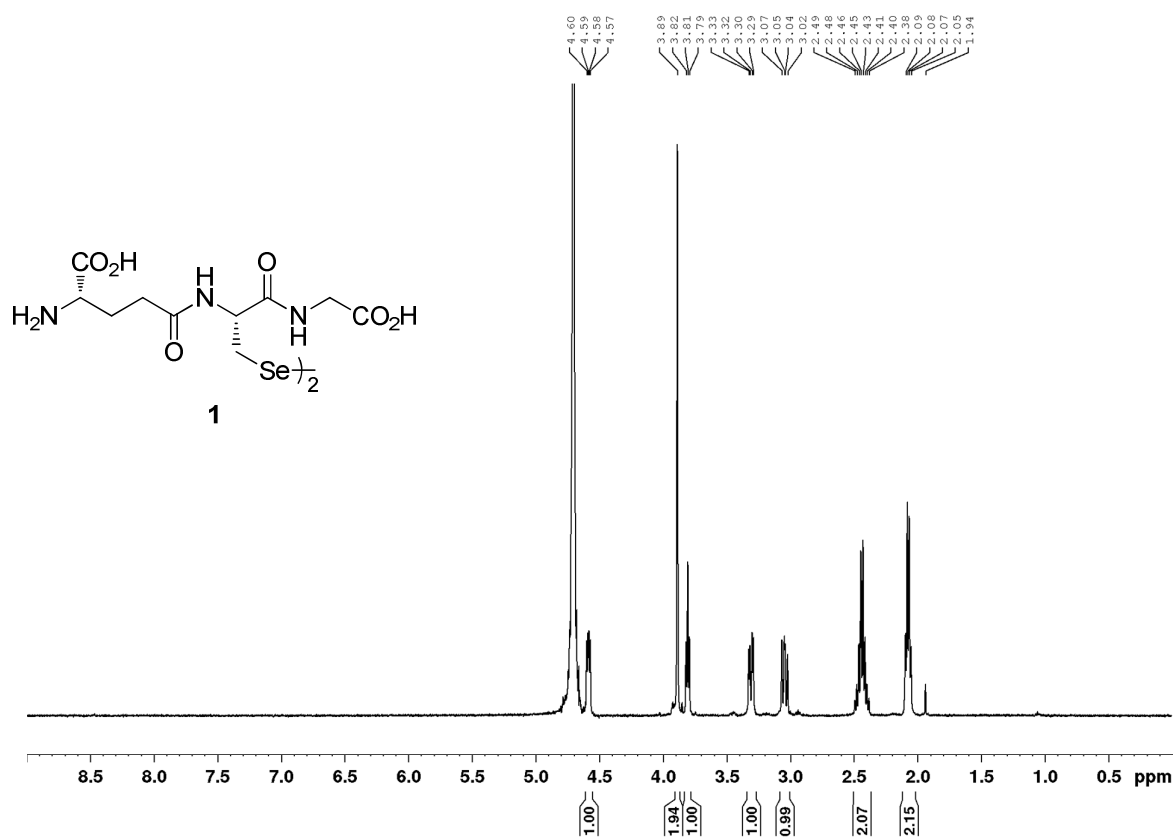

$^{13}\text{C}$  in  $\text{D}_2\text{O}$

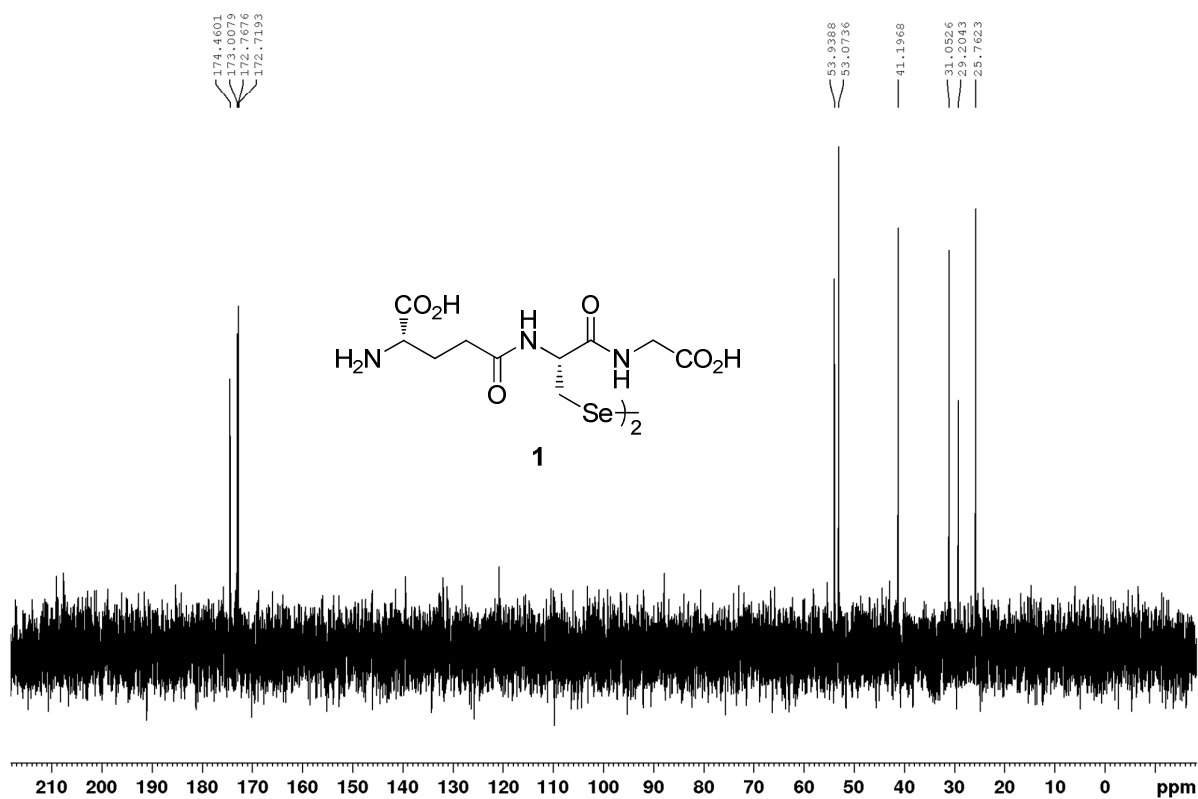

$^{77}\text{Se}$  in  $\text{D}_2\text{O}$

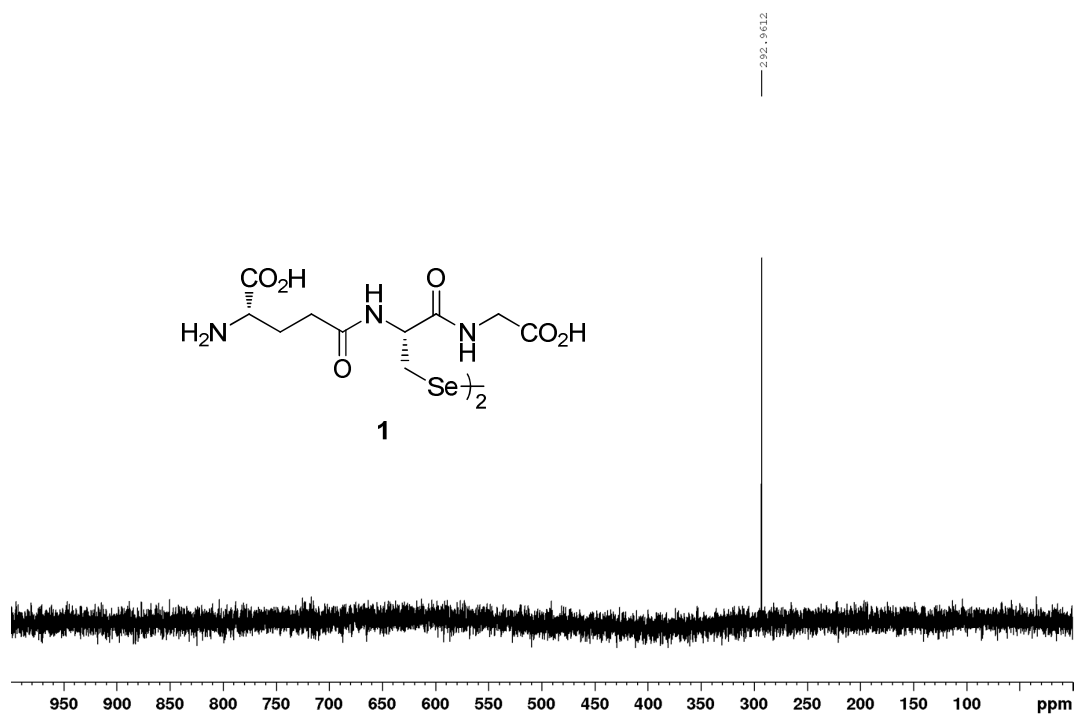

#### MALDI-TOF-MS

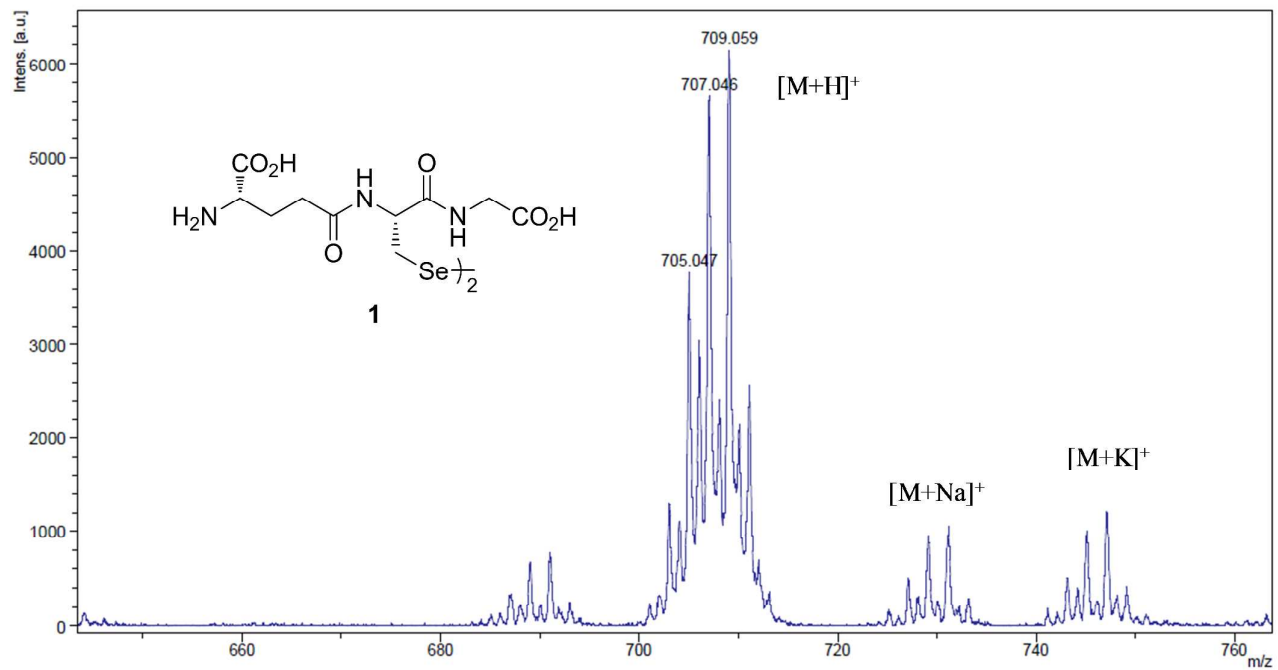

***N*-(*tert*-butoxycarbonyl)-*O*<sup>1</sup>-*tert*-butyl-L-glutamyl-Se-(acetamide)-L-selenocysteinyl-glycine-*tert*-butyl ester (**8**)**

<sup>1</sup>H in CDCl<sub>3</sub>

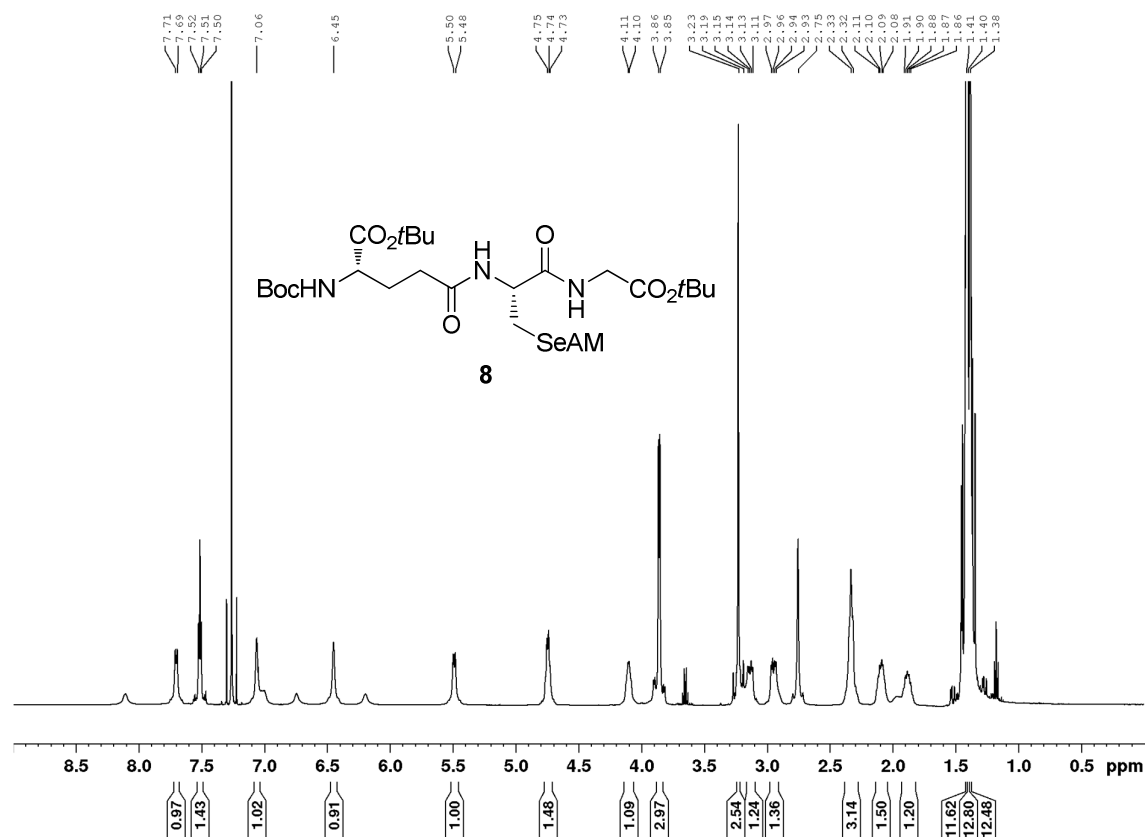

<sup>13</sup>C in CDCl<sub>3</sub>

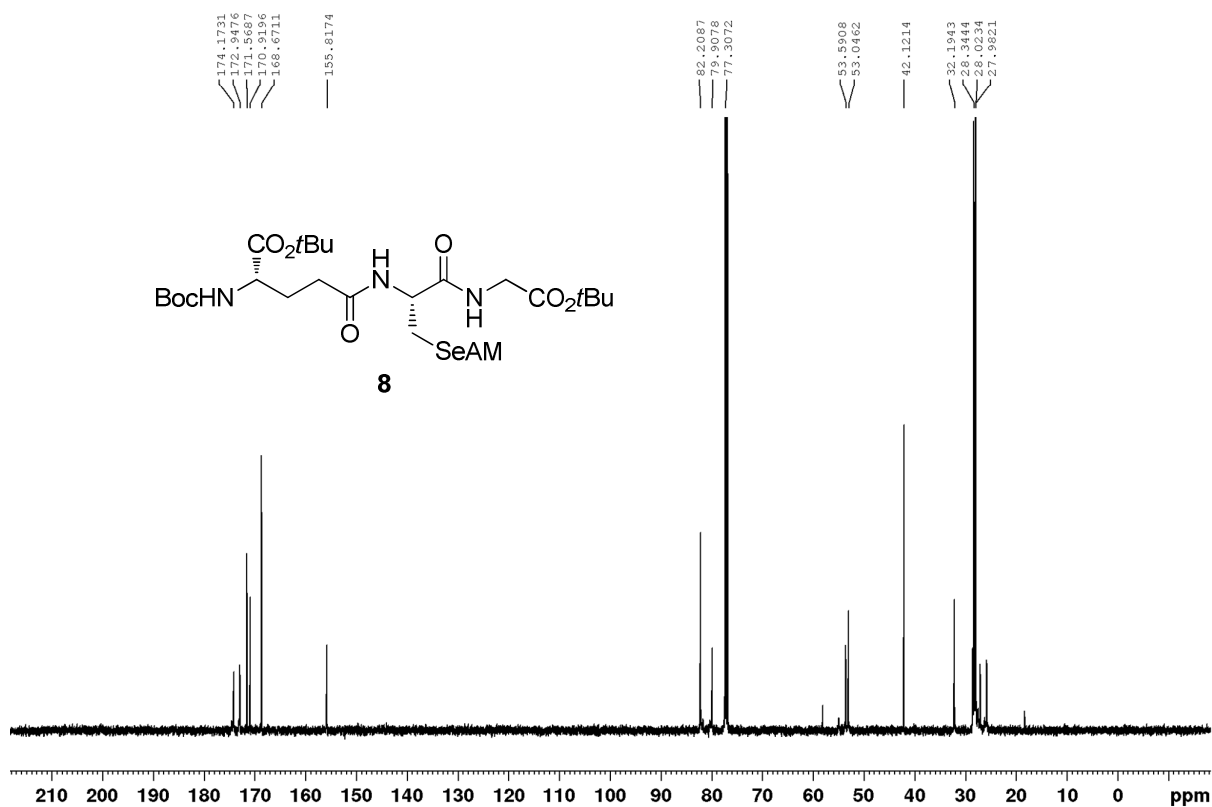

$^{77}\text{Se}$  in  $\text{CDCl}_3$

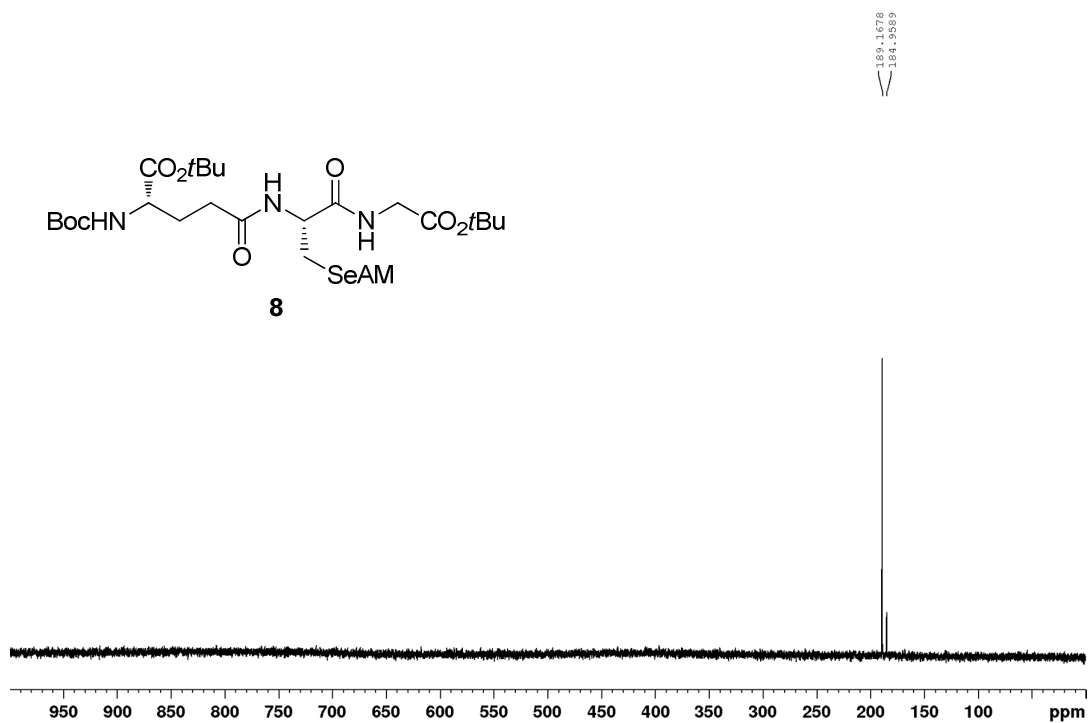

MALDI-TOF-MS

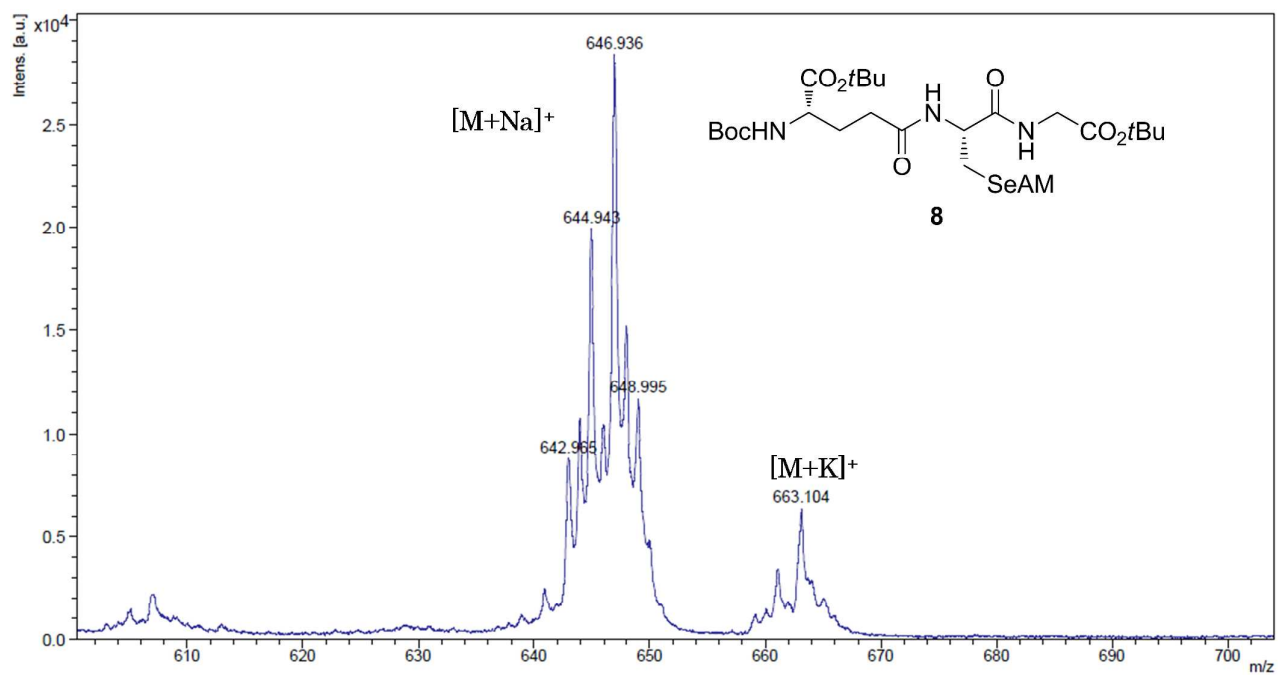

**gamma-L-glutamyl-Se-(acetamide)-L-selenocysteinyl-glycine (9)**

$^1\text{H}$  in  $\text{D}_2\text{O}$

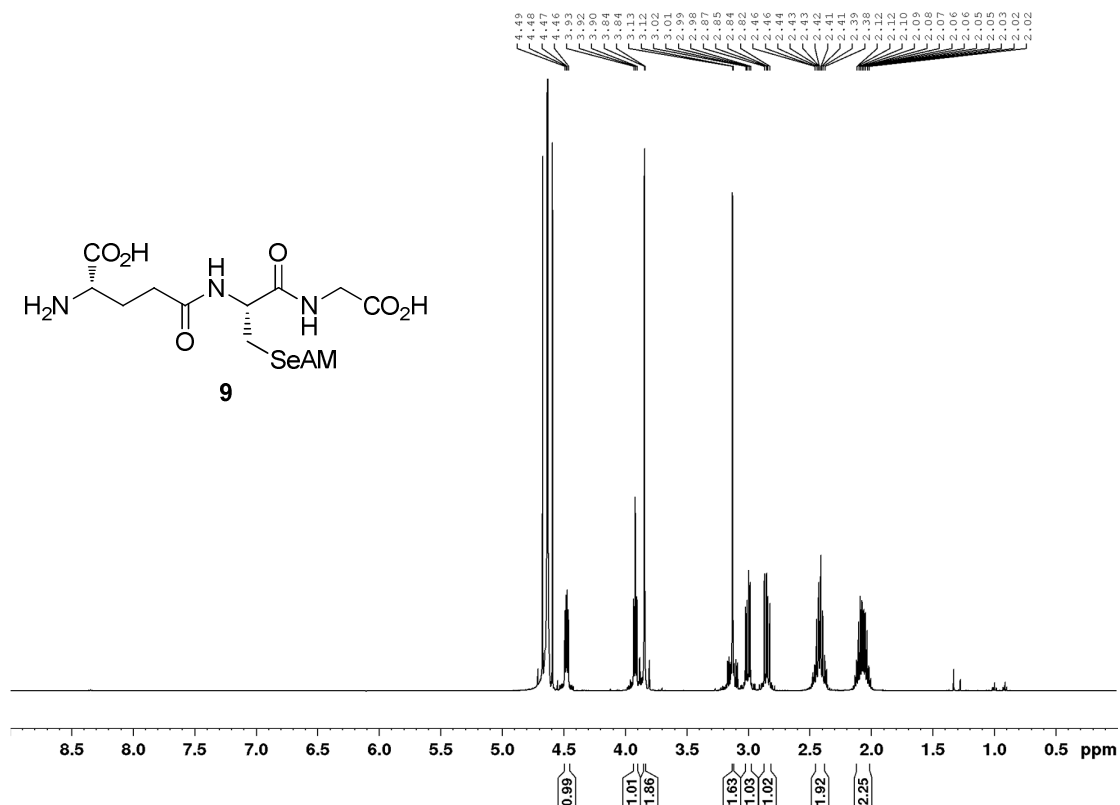

$^{13}\text{C}$  in  $\text{D}_2\text{O}$

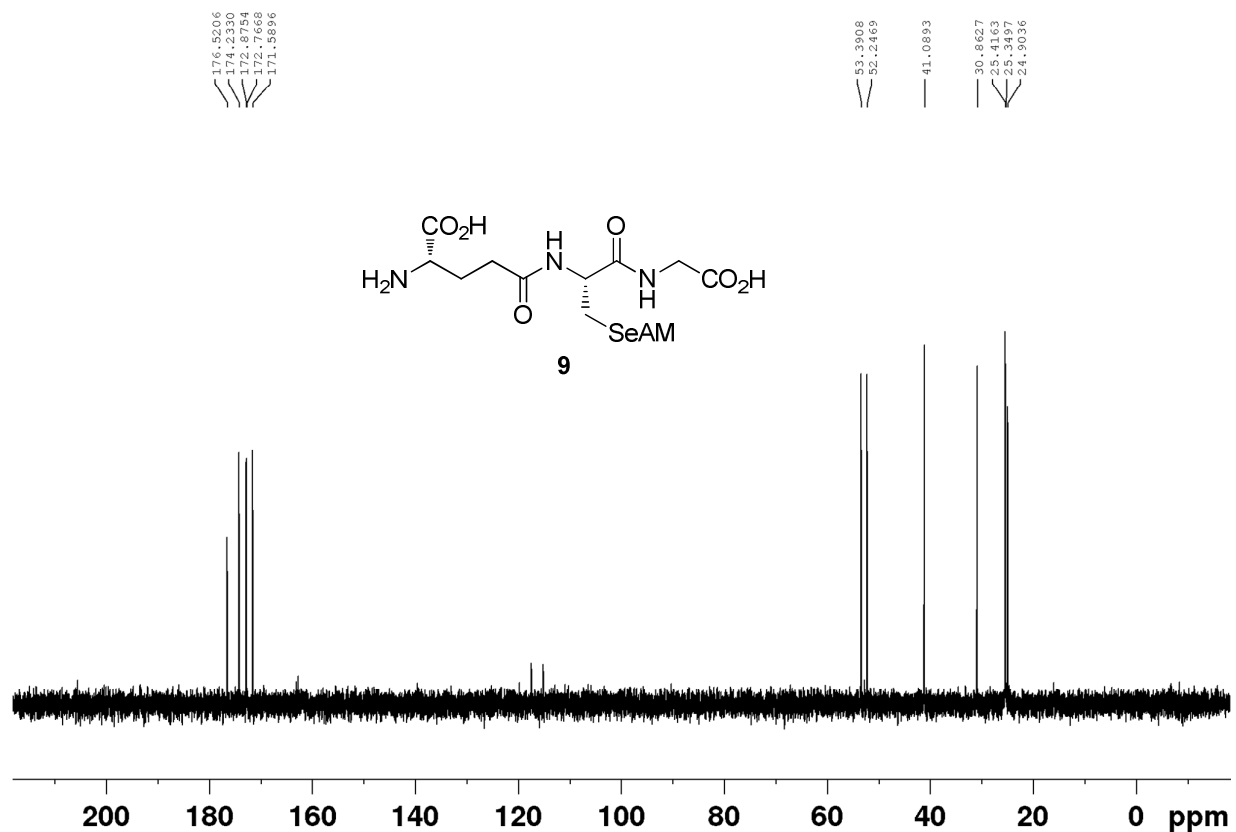

$^{77}\text{Se}$  in  $\text{D}_2\text{O}$

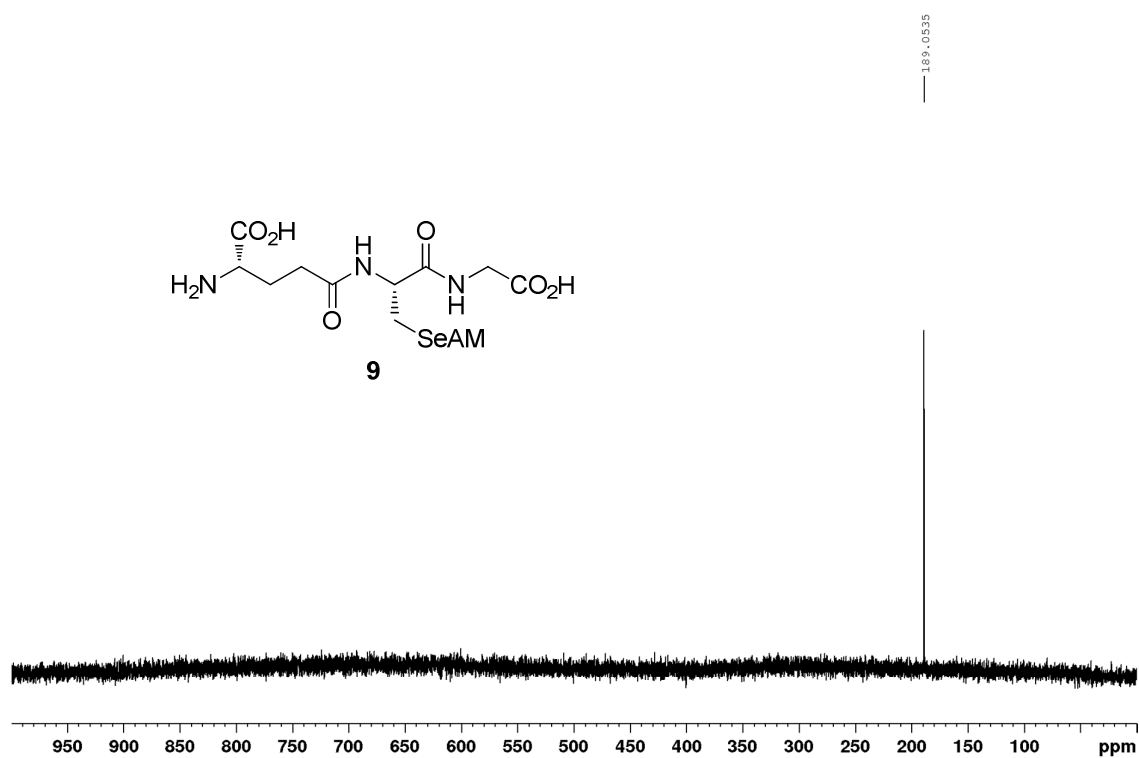

MALDI-TOF-MS

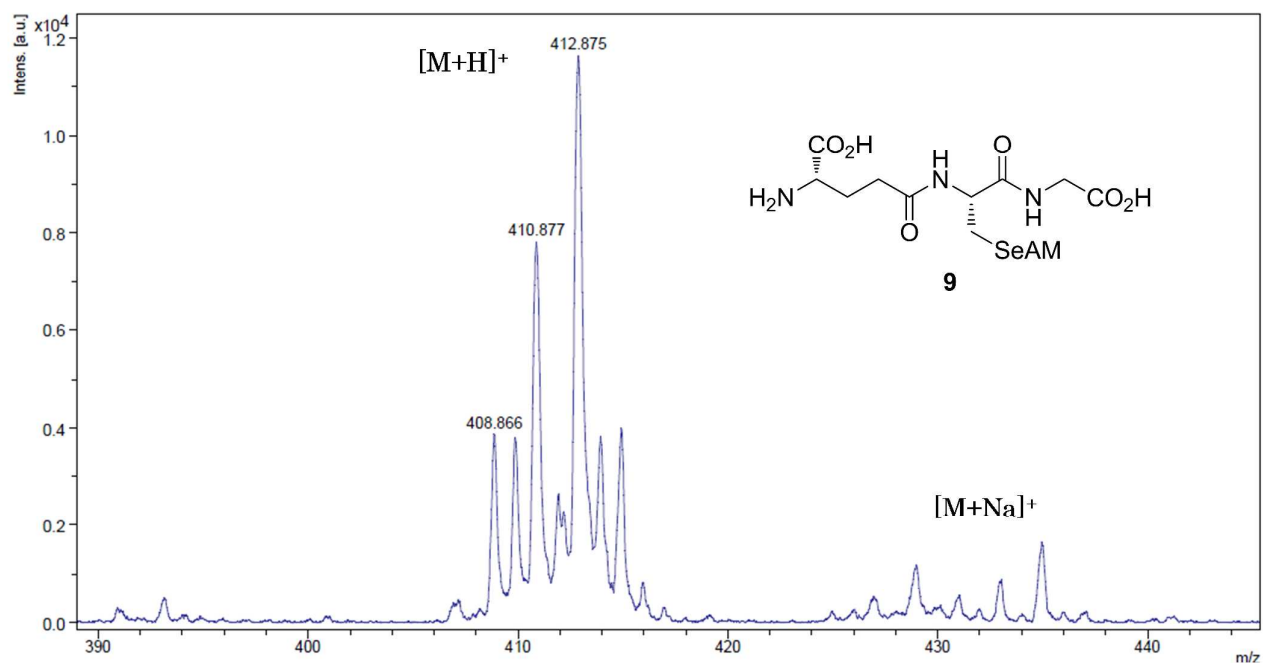

Supplement: Supplementary file 1 [file 9500896]
